# Supplementary material
Source: Springer Nature journal article supplement (https://www.springermedizin.de/resource/supplementary/12933_2007_82_MOESM1_ESM.pdf/9539612)

471 bp

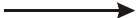

274 bp

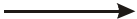

197 bp

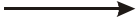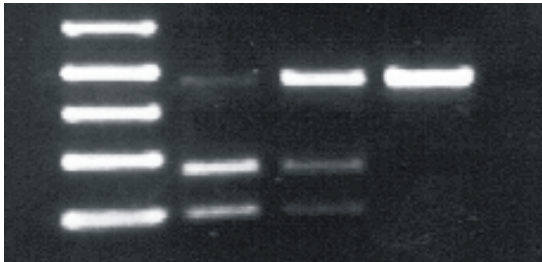

$\lambda$

1

2

3

Supplement: MOESM1 [file 9539612]
